# Supplementary material
Source: PubMed Central journal article supplement (PMC7299781)
Supplement: NIHMS1560746-supplement-1.pdf [file NIHMS1560746-supplement-1.pdf]

Table S1: Summary patient demographics, pathologic features, and treatment details

| <b>Patient characteristics (n = 31)</b>          | <b>No.</b> | <b>%</b>   |
|--------------------------------------------------|------------|------------|
| Age, median (range)                              | 65         | (46-82)    |
| Gender                                           |            |            |
| Female                                           | 16         | (52)       |
| Male                                             | 15         | (48)       |
| Smoking status                                   |            |            |
| Former                                           | 22         | (71)       |
| Current                                          | 8          | (26)       |
| Never                                            | 1          | (3)        |
| Histology                                        |            |            |
| Non-squamous                                     | 28         | (90)       |
| Squamous                                         | 3          | (10)       |
| Line of therapy                                  |            |            |
| 1 <sup>st</sup>                                  | 22         | (71)       |
| 2 <sup>nd</sup>                                  | 5          | (16)       |
| 3 <sup>rd</sup> +                                | 4          | (13)       |
| PD-L1 expression*                                |            |            |
| 0%                                               | 6          | (19)       |
| 1-49%                                            | 9          | (29)       |
| ≥ 50%                                            | 16         | (52)       |
| Treatment                                        |            |            |
| Anti-PD-(L)1 monotherapy                         | 10         | (32)       |
| Anti-PD-(L)1+CTLA-4 combination                  | 15         | (48)       |
| Anti-PD-(L)1 combination miscellaneous           | 6          | (19)       |
| Anti-PD-1+bevacizumab                            | 3          | (10)       |
| Anti-PD-L1+erlotinib <sup>^</sup>                | 2          | (6)        |
| Anti-PD-1+anti-LAG-3                             | 1          | (3)        |
| Best overall response                            |            |            |
| CR, complete response                            |            |            |
| PR, partial response                             | 7          | (23)       |
| SD, stable disease                               | 18         | (58)       |
|                                                  | 6          | (19)       |
| Tumor NGS available                              |            |            |
| Yes                                              | 24         | (77)       |
| No                                               | 7          | (23)       |
| Tumor mutational burden/megabase, median (range) | 11.6       | (2.6-42.3) |

\*PD-L1 expression unknown for 1 patient

<sup>^</sup>both patients EGFR WT
